# Supplementary material for: The Role of FBXW7 in Gynecologic Malignancies
Source: MDPI journal article supplement (doi:10.3390/cells12101415), 2023-05-17
Supplement: s1 [file s1]

**Supplementary Table S1.** Summary of the study conducted using the cBioPortal Database\*

| <b>Study</b>                                                 | <b>N. of cases</b> | <b>N. of cases with <i>FBXW7</i> mutation detected</b> | <b>Frequency (%)</b> |
|--------------------------------------------------------------|--------------------|--------------------------------------------------------|----------------------|
| Cervical Squamous Cell Carcinoma (TCGA, PanCancer Atlas)     | 297                | 39                                                     | 13.13                |
| Endometrial Carcinoma (CPTAC, Cell 2020)                     | 81                 | 15                                                     | 18.52                |
| Endometrial Carcinoma MSI (MSK, Clin Cancer Res 2022)        | 181                | 44                                                     | 24.31                |
| Endometrial Carcinoma cfDNA (MSK, Clin Cancer Res 2022)      | 44                 | 12                                                     | 27.27                |
| Low-Grade Serous Ovarian Cancer (MSK, Clin Cancer Res 2022)  | 119                | not profiled                                           | --                   |
| Ovarian Serous Cystadenocarcinoma (TCGA, PanCancer Atlas)    | 585                | 17                                                     | 2.91                 |
| Small Cell Carcinoma of the Ovary (MSK, Nat Genet 2014)      | 12                 | not profiled                                           | --                   |
| Squamous Cell Carcinoma of the Vulva (CUK, Exp Mol Med 2018) | 15                 | 2                                                      | 13.33                |
| Uterine Carcinosarcoma (Johns Hopkins, Nat Commun 2014)      | 22                 | 5                                                      | 22.73                |
| Uterine Carcinosarcoma (TCGA, PanCancer Atlas)               | 57                 | 22                                                     | 38.60                |
| Uterine Clear Cell Carcinoma (NIH, Cancer 2017)              | 16                 | 1                                                      | 6.25                 |
| Uterine Corpus Endometrial Carcinoma (TCGA, PanCancer Atlas) | 529                | 98                                                     | 18.53                |

\*12 studies that are manually curated, including TCGA and non-TCGA studies with no overlapping samples. cBioPortal Database (<https://www.cbioportal.org/>).
